# Supplementary material for: The Associations of Periodontopathic Bacteria and Oral Candida with Periodontal Inflamed Surface Area in Older Adults Receiving Supportive Periodontal Therapy
Source: MDPI journal article supplement (doi:10.3390/diagnostics11081397), 2021-08-02
Supplement: s1 [file s1]

**Supplementary Table S1. Multivariable analysis with the presence of *P. gingivalis* as dependent valuable**

| Variables       | Odds ratio | 95% CI    | P    |
|-----------------|------------|-----------|------|
| Remaining teeth | 0.95       | 0.88-1.03 | 0.20 |

**Supplementary Table S2. Multivariable analysis with the presence of *T. forsythia* as dependent valuable**

| Variables | Odds ratio | 95% CI     | P    |
|-----------|------------|------------|------|
| Age       | 0.94       | 0.87-1.00  | 0.07 |
| PISA      | 1.00       | 1.00-1.01  | 0.10 |
| PESA      | 1.00       | 1.00-1.003 | 0.54 |

**Supplementary Table S3. Multivariable analysis with the presence of *T. denticola* s as dependent valuable**

| Variables | Odds ratio | 95% CI     | P     |
|-----------|------------|------------|-------|
| PESA      | 1.00       | 1.00-1.003 | 0.048 |

**Supplementary Table S4. Multivariable analysis with the presence of *P. gingivalis*/*T. forsythia* as dependent valuable**

| Variables       | Odds ratio | 95% CI    | P    |
|-----------------|------------|-----------|------|
| Remaining teeth | 0.95       | 0.88-1.03 | 0.21 |

**Supplementary Table S5. Multivariable analysis with the presence of *P. gingivalis*/*T. denticola* as dependent valuable**

| Variables    | Odds ratio | 95% CI     | P    |
|--------------|------------|------------|------|
| PISA         | 1.00       | 1.00-1.003 | 0.48 |
| PESA         | 1.00       | 1.00-1.003 | 0.24 |
| Dyslipidemia | 0.41       | 0.13-1.38  | 0.15 |

**Supplementary Table S6. Multivariable analysis with the presence of *T. forsythia*/*T. denticola* as dependent valuable**

| Variables    | Odds ratio | 95% CI     | P    |
|--------------|------------|------------|------|
| PISA         | 0.97       | 0.92-1.02  | 0.24 |
| PESA         | 1.00       | 0.998-1.00 | 0.58 |
| Dyslipidemia | 1.00       | 1.00-1.003 | 0.73 |

**Supplementary Table S7. Multivariable analysis with the presence of *P. gingivalis*/*T. forsythia*/*T. denticola* as dependent valuable**

| Variables | Odds ratio | 95% CI     | P    |
|-----------|------------|------------|------|
| PISA      | 1.00       | 1.00-1.004 | 0.27 |
| PESA      | 1.00       | 1.00-1.002 | 0.42 |

**Supplementary Table S8. Multivariable analysis with the presence of *C. albicans* as dependent valuable**

| Variables    | Odds ratio | 95% CI    | P    |
|--------------|------------|-----------|------|
| Hypertension | 0.39       | 0.12-1.29 | 0.12 |
| Dyslipidemia | 0.39       | 0.11-1.43 | 0.15 |
| Smoking      | 3.32       | 0.78-14.2 | 0.10 |

**Supplementary Table S9. Multivariable analysis with the presence of *P. gingivalis*/*C. albicans* as dependent valuable**

| Variables       | Odds ratio | 95% CI    | P    |
|-----------------|------------|-----------|------|
| Hypertension    | 0.46       | 0.12-1.76 | 0.26 |
| Remaining teeth | 0.91       | 0.83-0.99 | 0.03 |

**Supplementary Table S10. Multivariable analysis with the presence of *T. forsythia*/*C. albicans* as dependent valuable**

| Variables    | Odds ratio | 95% CI     | P    |
|--------------|------------|------------|------|
| Hypertension | 0.38       | 0.10-1.42  | 0.15 |
| Dyslipidemia | 0.34       | 0.08-1.46  | 0.15 |
| Smoking      | 4.41       | 0.97-20.1  | 0.06 |
| PISA         | 1.00       | 1.00-1.002 | 0.70 |

**Supplementary Table S11. Multivariable analysis with the presence of *T. denticola*/*C. albicans* as dependent valuable**

| Variables    | Odds ratio | 95% CI     | P    |
|--------------|------------|------------|------|
| Diabetes     | 0.23       | 0.02-2.20  | 0.20 |
| Dyslipidemia | 0.33       | 0.07-1.57  | 0.16 |
| PISA         | 1.00       | 1.00-1.003 | 0.34 |

**Supplementary Table S12. Multivariable analysis with the presence of *P. gingivalis*/T. *forsythia*/C. *albicans* as dependent valuable**

| Variables       | Odds ratio | 95% CI     | P    |
|-----------------|------------|------------|------|
| Remaining teeth | 0.91       | 0.83-0.99  | 0.03 |
| PISA            | 1.00       | 1.00-1.003 | 0.19 |

**Supplementary Table S13. Multivariable analysis with the presence of *P. gingivalis*/T. *denticola* /C. *albicans* as dependent valuable**

| Variables    | Odds ratio | 95% CI     | P    |
|--------------|------------|------------|------|
| Dyslipidemia | 0.27       | 0.03-2.22  | 0.22 |
| PISA         | 1.00       | 1.00-1.004 | 0.16 |

**Supplementary Table S14. Multivariable analysis with the presence of T. *forsythia*/T. *denticola*/C. *albicans* as dependent valuable**

| Variables    | Odds ratio | 95% CI     | P    |
|--------------|------------|------------|------|
| Dyslipidemia | 0.14       | 0.02-1.12  | 0.06 |
| PISA         | 1.00       | 1.00-1.003 | 0.36 |

**Supplementary Table S15. Multivariable analysis with the presence of *P. gingivalis*/T. *forsythia*/T. *denticola*/C. *albicans* as dependent valuable**

| Variables    | Odds ratio | 95% CI     | P    |
|--------------|------------|------------|------|
| Dyslipidemia | 0.27       | 0.03-2.23  | 0.22 |
| PISA         | 1.00       | 1.00-1.003 | 0.34 |
